# Supplementary material for: Discovery, Structure–Activity Relationship and In Vitro Anticancer Activity of Small-Molecule Inhibitors of the Protein–Protein Interactions between AF9/ENL and AF4 or DOT1L
Source: MDPI journal article supplement (doi:10.3390/cancers15215283), 2023-11-03

## Supplementary Materials

# Discovery, Structure–Activity Relationship and In Vitro Anticancer Activity of Small-Molecule Inhibitors of the Protein–Protein Interactions between AF9/ENL and AF4 or DOT1L

Xin Li, Xiaowei Wu, Shenyou Nie, Jidong Zhao, Yuan Yao, Fangrui Wu, Chandra Bhushan Mishra, Md Ashraf-Uz-Zaman, Bala Krishna Moku and Yongcheng Song

### Table of Contents:

|                                                                     |         |
|---------------------------------------------------------------------|---------|
| Figure S1 Dose-dependent inhibition of AF9 AHD-DOT1L interaction    | Page S2 |
| Figure S2 Dose-dependent inhibition of different cancer cell growth | Page S3 |
| Respective HPLC tracers                                             | Page S4 |
| The uncropped blots with densitometry readings/intensity ratio      | Page S7 |

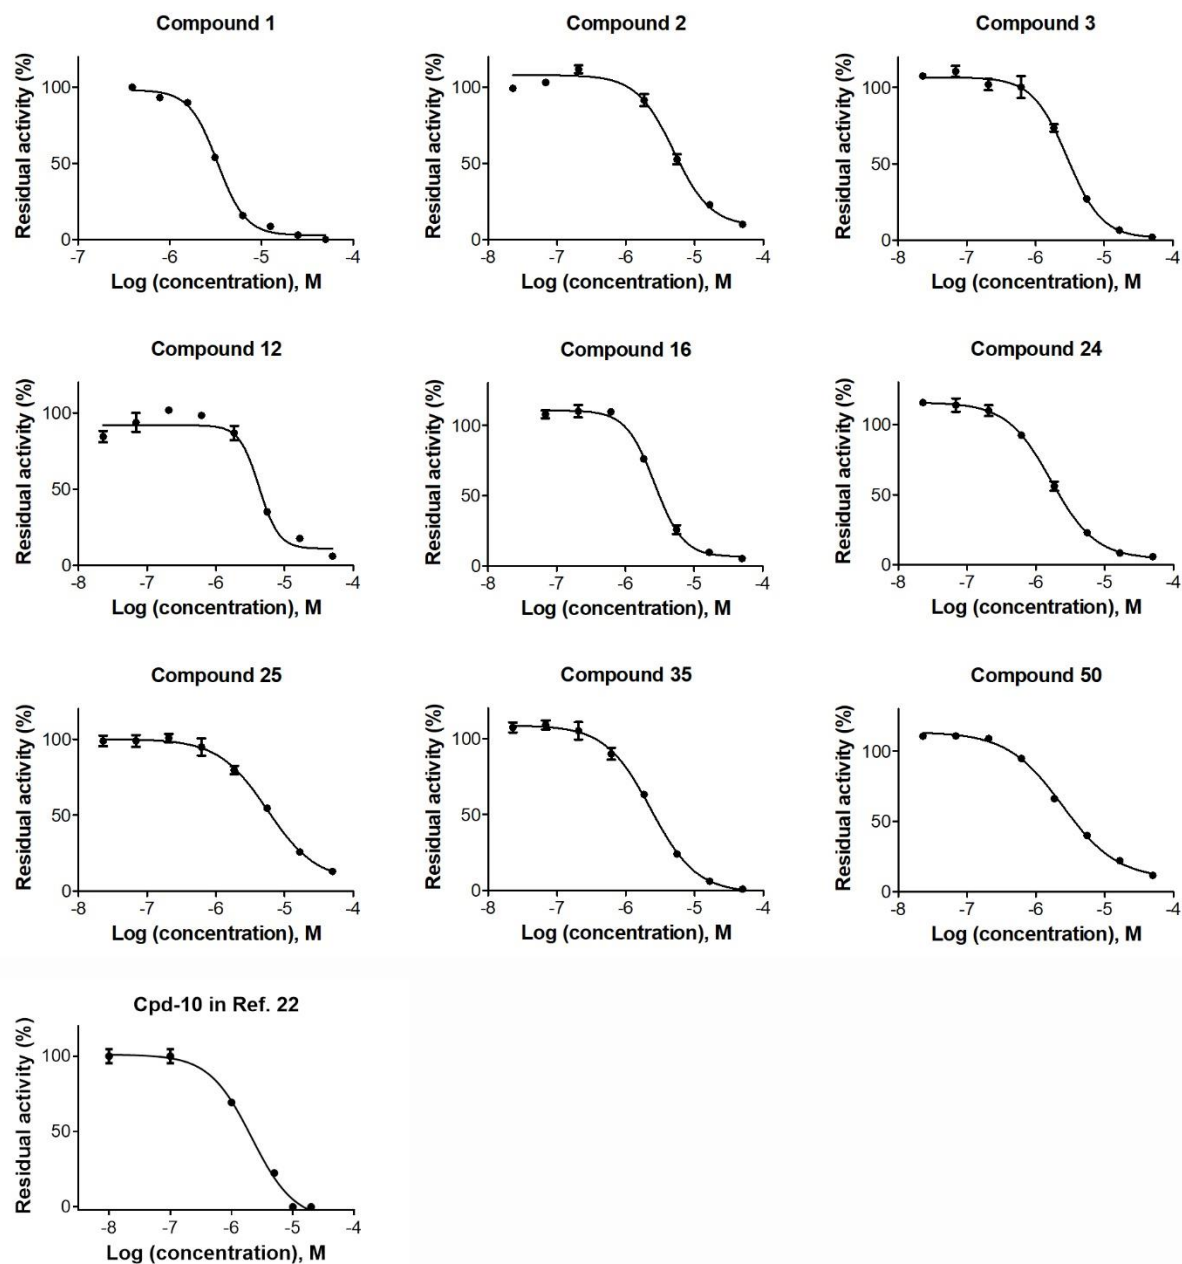

**Figure S1** Dose-dependent inhibition of AF9 AHD-DOT1L interaction.

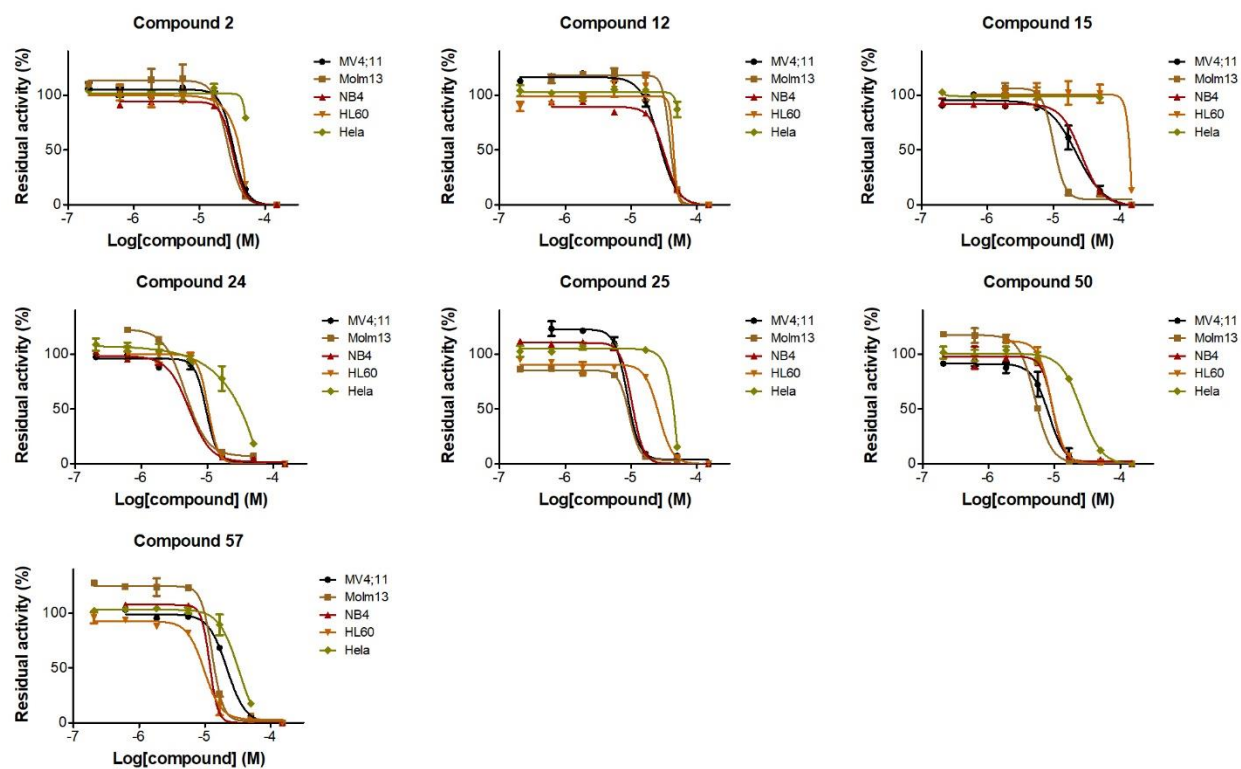

**Figure S2** Dose-dependent inhibition of different cancer cell growth.

Respective HPLC tracers.

Compound 2, retention time, 3.232 min; MS (M + H)<sup>+</sup> found 417.3

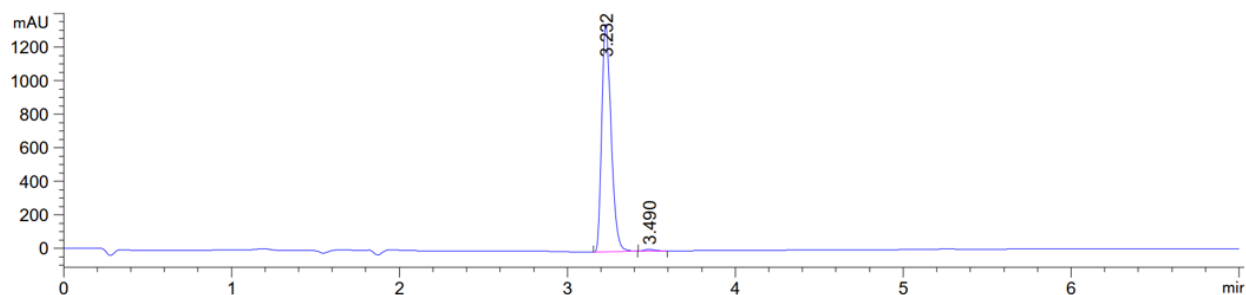

Signal 1: DAD1 A, Sig=254,4 Ref=off

| Peak # | RetTime [min] | Type | Width [min] | Area [mAU*s] | Height [mAU] | Area %  |
|--------|---------------|------|-------------|--------------|--------------|---------|
| 1      | 3.232         | BB   | 0.0588      | 5232.22998   | 1363.86230   | 99.1639 |
| 2      | 3.490         | BB   | 0.0720      | 44.11741     | 9.89114      | 0.8361  |

Totals : 5276.34739 1373.75344

Compound 12, retention time, 3.714 min; MS (M + H)<sup>+</sup> found 403.3

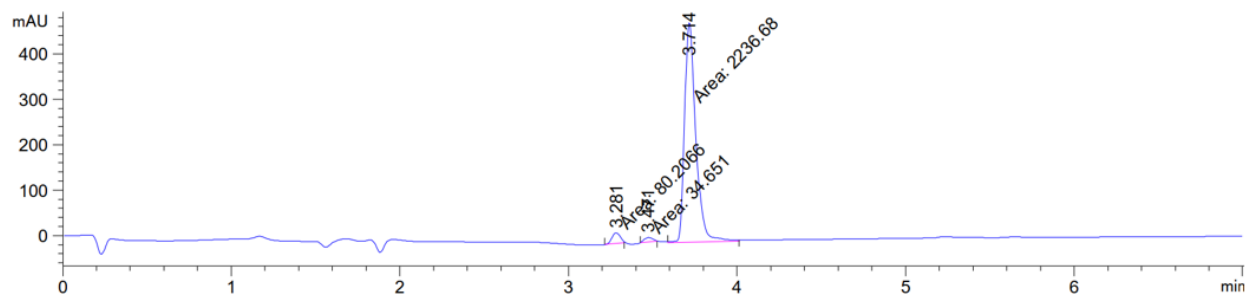

Signal 1: DAD1 A, Sig=254,4 Ref=off

| Peak # | RetTime [min] | Type | Width [min] | Area [mAU*s] | Height [mAU] | Area %  |
|--------|---------------|------|-------------|--------------|--------------|---------|
| 1      | 3.281         | MM   | 0.0566      | 80.20657     | 23.62328     | 3.4108  |
| 2      | 3.471         | MM   | 0.0571      | 34.65096     | 10.11941     | 1.4735  |
| 3      | 3.714         | MM   | 0.0766      | 2236.67993   | 486.57336    | 95.1156 |

Totals : 2351.53747 520.31605

Compound 15, retention time, 3.335 min; MS (M + H)<sup>+</sup> found 417.3

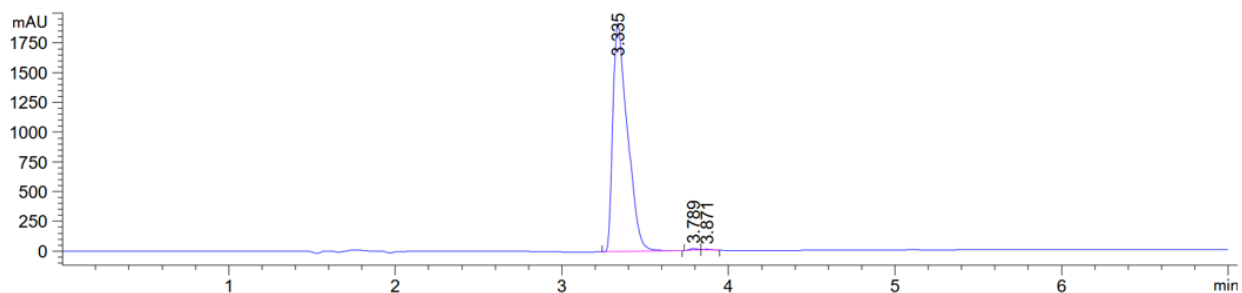

Signal 1: DAD1 A, Sig=254,4 Ref=off

| Peak # | RetTime [min] | Type | Width [min] | Area [mAU*s] | Height [mAU] | Area %  |
|--------|---------------|------|-------------|--------------|--------------|---------|
| 1      | 3.335         | BB   | 0.0867      | 1.16233e4    | 1917.57654   | 99.5664 |
| 2      | 3.789         | BB   | 0.0497      | 36.38499     | 11.89926     | 0.3117  |
| 3      | 3.871         | BB   | 0.0545      | 14.22750     | 4.31387      | 0.1219  |

Totals : 1.16739e4 1933.78967

Compound 16, retention time, 3.984 min; MS (M + H)<sup>+</sup> found 403.3

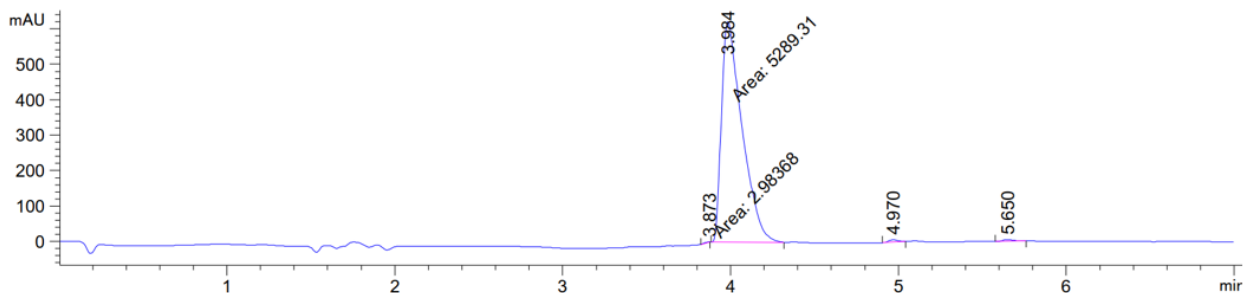

Signal 1: DAD1 A, Sig=254,4 Ref=off

| Peak # | RetTime [min] | Type | Width [min] | Area [mAU*s] | Height [mAU] | Area %  |
|--------|---------------|------|-------------|--------------|--------------|---------|
| 1      | 3.873         | MM   | 0.0496      | 2.98368      | 1.00349      | 0.0559  |
| 2      | 3.984         | MM   | 0.1416      | 5289.30957   | 622.55463    | 99.0657 |
| 3      | 4.970         | BB   | 0.0602      | 23.97388     | 6.33225      | 0.4490  |
| 4      | 5.650         | BB   | 0.0675      | 22.92617     | 5.19708      | 0.4294  |

Totals : 5339.19330 635.08745

Compound 24, retention time, 3.484 min; MS (M + H)<sup>+</sup> found 434.2

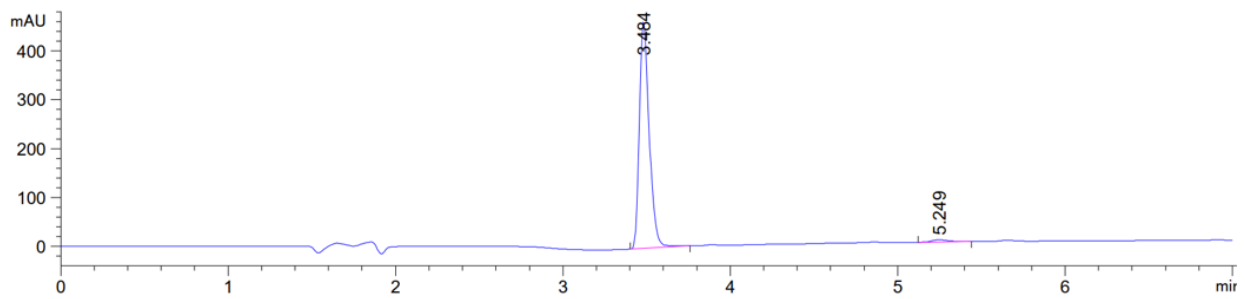

Signal 1: DAD1 A, Sig=254,4 Ref=off

| Peak # | RetTime [min] | Type | Width [min] | Area [mAU*s] | Height [mAU] | Area %  |
|--------|---------------|------|-------------|--------------|--------------|---------|
| 1      | 3.484         | BB   | 0.0623      | 1917.72510   | 463.20731    | 98.4394 |
| 2      | 5.249         | BB   | 0.1029      | 30.40329     | 4.49297      | 1.5606  |

Totals : 1948.12839 467.70028

Compound 50, retention time, 3.458 min; MS (M + H)<sup>+</sup> found 434.3

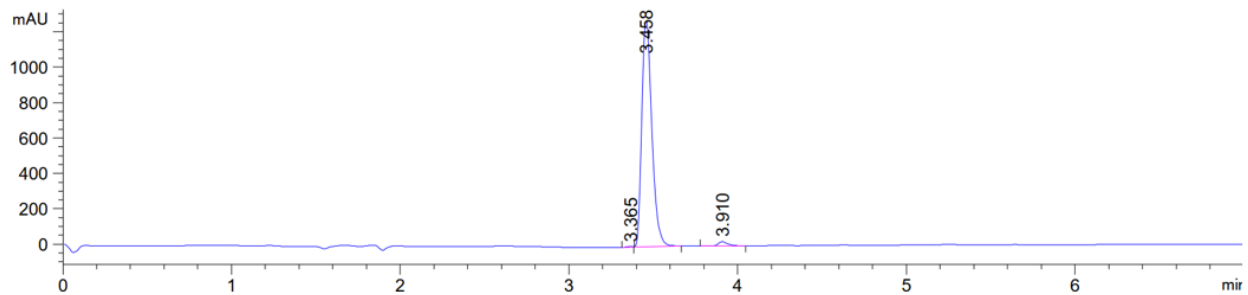

Signal 1: DAD1 A, Sig=254,4 Ref=off

| Peak # | RetTime [min] | Type | Width [min] | Area [mAU*s] | Height [mAU] | Area %  |
|--------|---------------|------|-------------|--------------|--------------|---------|
| 1      | 3.365         | BB   | 0.0403      | 5.05292      | 2.08479      | 0.0947  |
| 2      | 3.458         | BB   | 0.0637      | 5231.61377   | 1279.34778   | 98.0551 |
| 3      | 3.910         | BB   | 0.0623      | 98.71726     | 23.82796     | 1.8502  |

Totals : 5335.38396 1305.26054

The uncropped blots with densitometry readings/intensity ratio.

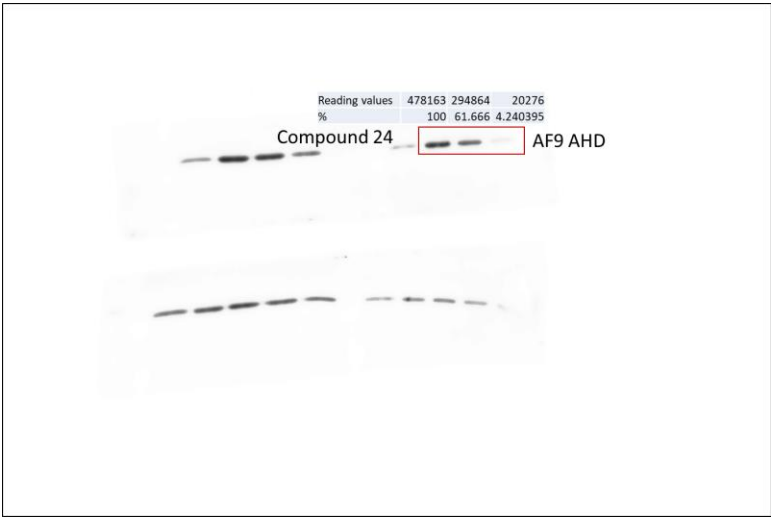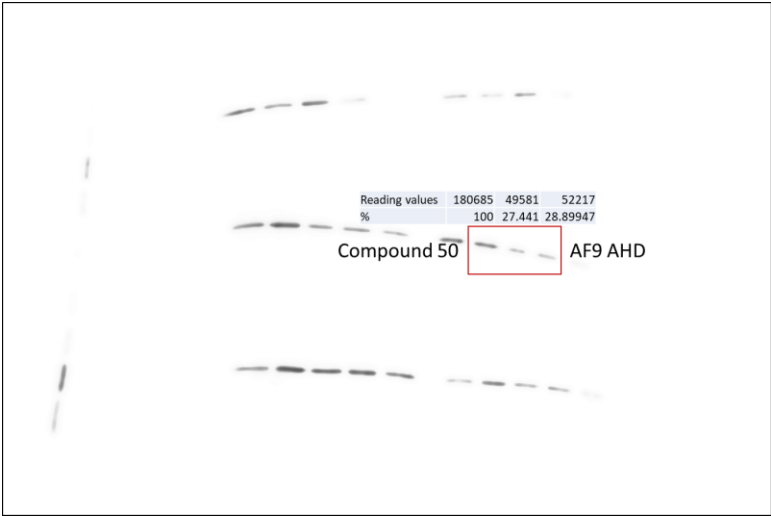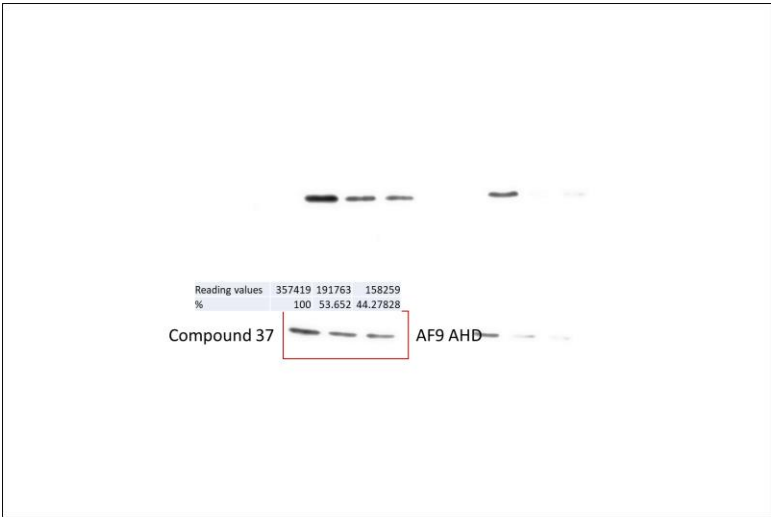

Supplement: s1 [file s1]
